# Supplementary material for: Preventing Pandemics Via International Development: A Systems Approach
Source: PLoS Med. 2012 Dec 11;9(12):e1001354. doi: 10.1371/journal.pmed.1001354 (PMC3519898; doi:10.1371/journal.pmed.1001354)
Supplement: Table S1 — WHO Diseases of Focus (http://www.who.int/csr/disease/en/). (PDF) [file pmed.1001354.s001.pdf]

**Supplementary Table S1:** WHO Diseases of Focus (<http://www.who.int/csr/disease/en/>)

Note, the WHO reports have also reported on other diseases such as:

cholera, poliomyelitis, Legionnaires', typhoid and shigellosis

**Disease**

Anthrax

Avian influenza

Crimean-Congo haemorrhagic fever (CCHF)

Dengue/dengue haemorrhagic fever

Ebola haemorrhagic fever

Hendra Virus (HeV) Infection

Hepatitis

Influenza

Lassa fever

Marburg haemorrhagic fever

Meningococcal disease

Human Monkeypox (MPX)

Nipah Virus (NiV) Infection

Pandemic (H1N1) 2009

Plague

Rift Valley fever

Severe Acute Respiratory Syndrome (SARS)

Smallpox

Tularaemia

Yellow fever
